# Supplementary material
Source: bioRxiv or medRxiv preprint supplement (https://medrxiv.org/highwire/filestream/95958/field_highwire_adjunct_files/3/2020.09.04.20188169-4.pdf)

# Supplementary Figure 4

**a**

| Patient ID | sex | age | days after ICU admission at time of analysis | days after start of symptoms at time of analysis | other viral infections | other bacterial infections | mortality | type 2 diabetes mellitus | chronic heart failure | coronary heart disease | spike protein-specific | RBD-specific antibodies | nucleoprotein-specific antibodies |
|------------|-----|-----|----------------------------------------------|--------------------------------------------------|------------------------|----------------------------|-----------|--------------------------|-----------------------|------------------------|------------------------|-------------------------|-----------------------------------|
| Healthy    | m   | 40  | N/A                                          | N/A                                              | n                      | n                          | n         | n                        | n                     | n                      | N/A                    | N/A                     | N/A                               |
| 10         | f   | 77  | 13                                           | 24                                               | n                      | y                          | y         | y                        | n                     | n                      | y                      | y                       | y                                 |
| 13         | m   | 50  | 29                                           | 35                                               | n                      | y                          | n         | n                        | n                     | y                      | y                      | y                       | y                                 |
| 14         | m   | 76  | 32                                           | 54                                               | n                      | y                          | n         | n                        | y                     | y                      | y                      | y                       | y                                 |
| Measles    | m   | 38  | N/A                                          | N/A                                              | n                      | n                          | n         | n                        | n                     | n                      | N/A                    | N/A                     | N/A                               |

**b**

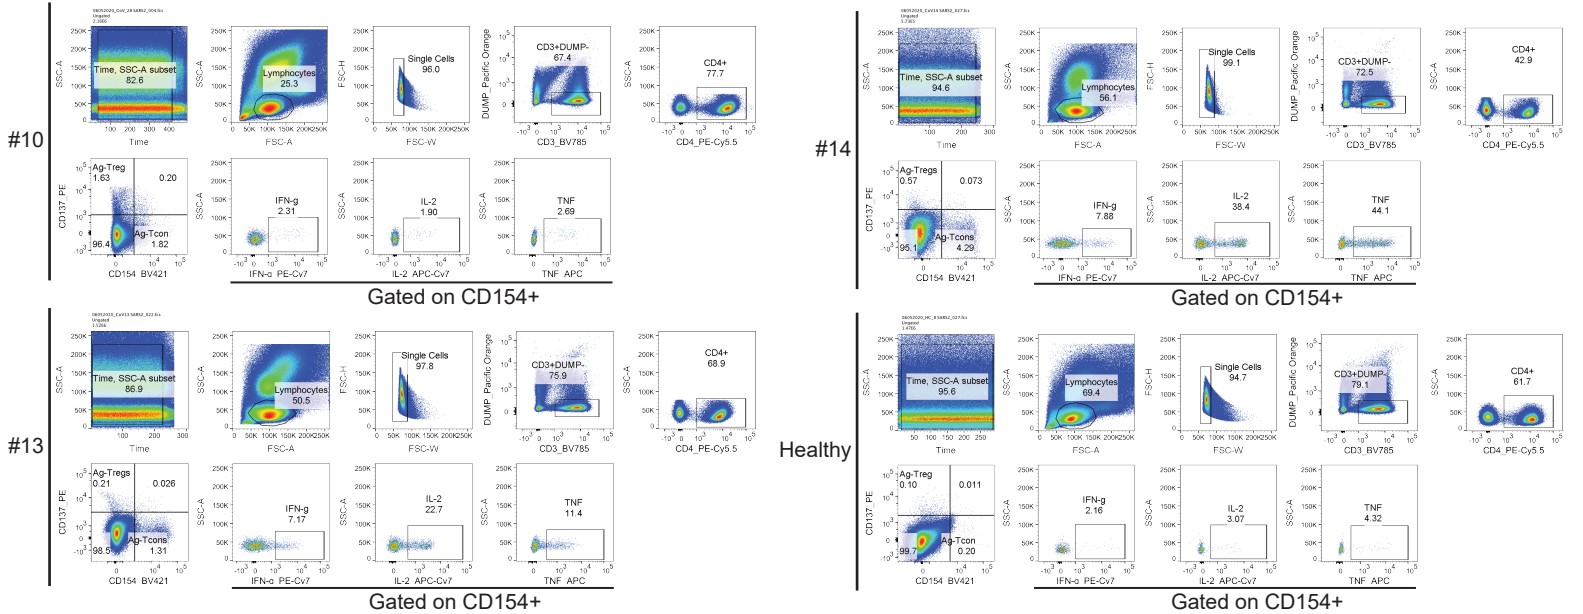

**c**

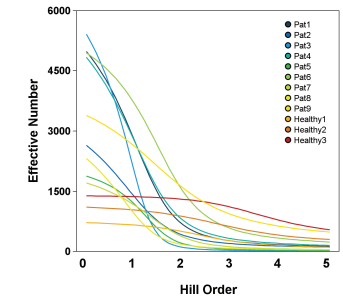

**d**

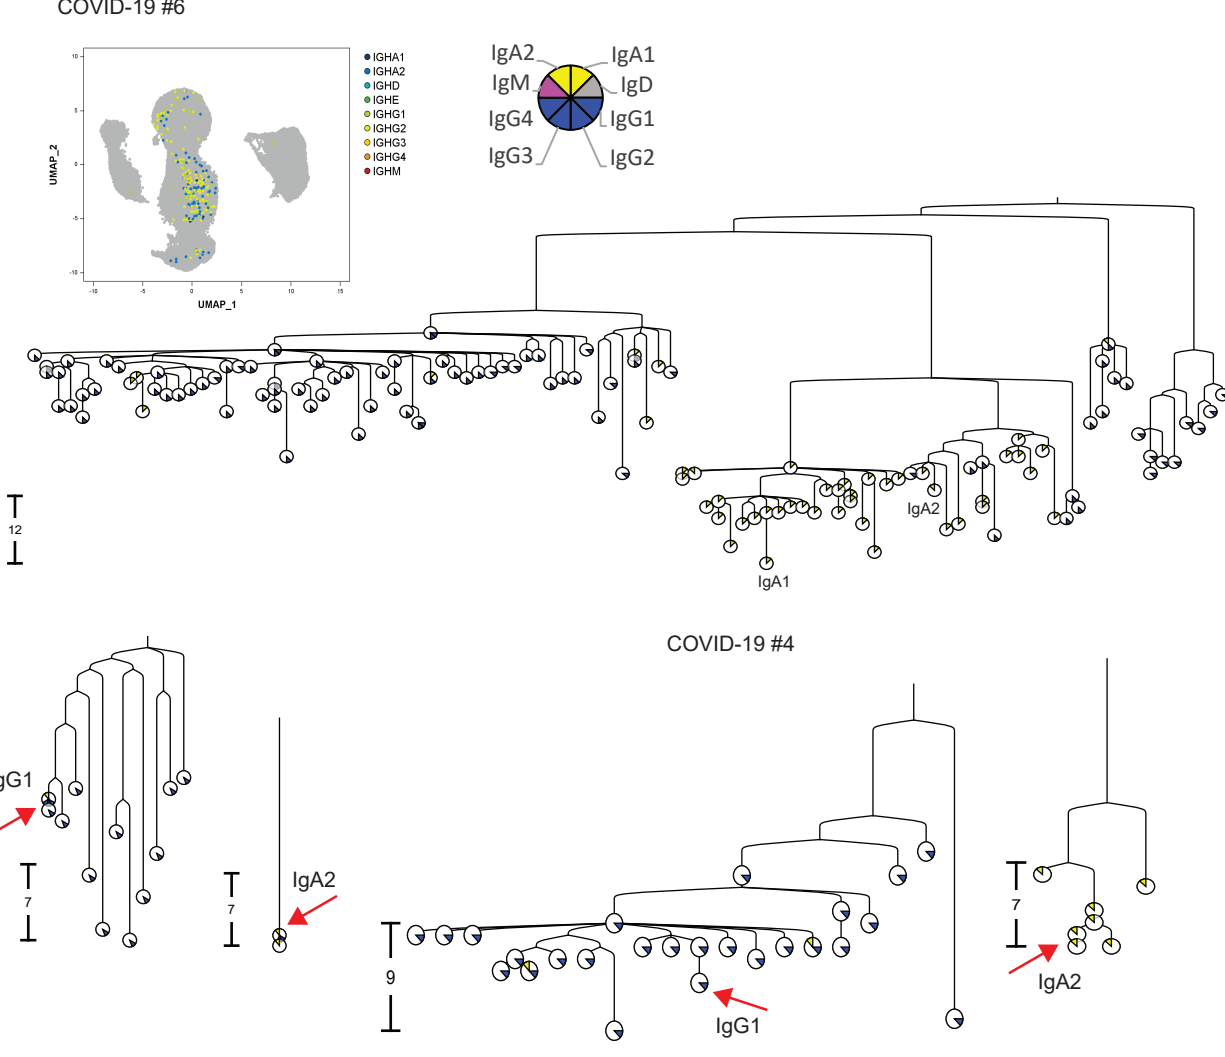

Supplement: Supplementary file [file 2020.09.04.20188169-4.pdf]
